# Supplementary material for: The fusiform gyrus exhibits an epigenetic signature for Alzheimer’s disease
Source: PubMed Central journal article supplement (PMC7457273; doi:10.1186/s13148-020-00916-3), 2020-08-27

## The fusiform gyrus exhibits an epigenetic signature for Alzheimer's disease

### Supplementary figures

Dingailu Ma<sup>1,2</sup>, Irfete S. Fetahu<sup>2</sup>, Mei Wang<sup>3</sup>, Rui Fang<sup>2</sup>, Jiahui Li<sup>1</sup>, Hang Liu<sup>1</sup>, Tobin Gramyk<sup>2</sup>, Isabella Iwanicki<sup>2</sup>, Sophie Gu<sup>2</sup>, Winnie Xu<sup>1</sup>, Li Tan<sup>1</sup>, Feizhen Wu<sup>1, \*</sup>, Yujiang G. Shi<sup>2, \*</sup>

<sup>1</sup>Laboratory of Epigenetics, Institutes of Biomedical Sciences, Fudan University, Shanghai, 200032, China, and Key Laboratory of Birth Defects, Children's Hospital of Fudan University, Shanghai, 201102, China.

<sup>2</sup>Division of Endocrinology, Diabetes and Hypertension, Department of Medicine, Brigham and Women's Hospital, Harvard Medical School, Boston, MA, 02115, USA.

<sup>3</sup>Department of Geriatrics, Shanghai General Hospital, Shanghai, 200080, China.

\*Corresponding author e-mail: [yujiang\\_shi@hms.harvard.edu](mailto:yujiang_shi@hms.harvard.edu), [wufz@fudan.edu.cn](mailto:wufz@fudan.edu.cn).

## Supplementary figure legends

### Figure S1.

(a-d) Venn diagrams showing the overlaps of the differentially expressed (DE) genes between brain regions only in controls. FUS (a): fusiform gyrus; HPC (b): hippocampus; TPL (c): temporal lobe; PFC (d): prefrontal cortex.

(e) PathView plot shows the neuroactive ligand-receptor interaction pathway (KEGG: hsa04080) and relevant genes involved in the FUS (left of gene-box) and TPL (right of gene-box). Color key represents the  $\log_2$  (fold-change) of expression in AD compared to normal controls.

(f) PathView plot shows the cytokine-cytokine receptor interaction pathway (KEGG: hsa04060) and relevant genes involved in the HPC (left of gene-box) and PFC (right of gene-box). Color key represents the  $\log_2$  (fold-change) of expression in AD compared to normal controls.

### Figure S2.

(a-b) Venn diagrams show the overlap of DE genes in PSEN1-N/WT-N (a) or APOE4-N/WT-N (b) at a cutoff of  $FC > 2$  with AD-FUS/Normal at cutoffs of both  $FC > 1.5$  and  $P\text{-value} < 0.05$ .

(c) Venn diagrams illustrate the overlap of DE genes between PSEN1-N, PSEN2-N and APOE4-N versus WT.

(d) GO enrichment analysis of the 1,372 common DE genes between PSEN2-N/WT-N and AD/Normal in the FUS.

(e) PathView plot shows part of the PI3K-AKT signaling pathway (KEGG: hsa04151) and relevant genes involved in iPSC-derived neurons (left of gene-box) and the FUS (right of gene-box). Color key represents  $\log_2$  (fold-change) of expression in AD compared to normal controls.

### **Figure S3.**

Protein-protein interactions (PPI) between known AD risk factors and 566 shared DE genes in PSEN1-N and AD-FUS. Blue dots represent known AD risk factors, while red and green dots stand for up- and down-regulated DE genes in AD, respectively.

### **Figure S4.**

Protein-protein interactions (PPI) between known AD risk factors and 566 shared DE genes in APOE4-N and AD-FUS. Blue dots represent known AD risk factors, while red and green dots stand for up- and down-regulated DE genes in AD, respectively.

### **Figure S5.**

(a-b) Boxplots show 5mC/5hmC/5fC/caC levels on the promoters (a) and gene bodies (b) of all Refseq genes in PSEN2-N and WT-N (all p-values  $<2.2e-16$ ).

(c-d) Boxplots show 5mC/5hmC/5fC/caC levels on the promoters (c) and gene bodies (d) of all Refseq genes in PSEN1-N and WT-N (all p-values  $<2.2e-16$ ).

(e-f) Boxplots show 5mC/5hmC/5fC/caC levels on the promoters (e) and gene bodies (f) of all Refseq genes in APOE4-N and WT-N (all p-values  $<2.2e-16$ ).

(g) Boxplots show the differences in expression (FPKM) fold-changes in methylation-gain and loss on the gene bodies of all Refseq genes. P-values were calculated by Wilcoxon rank sum test ( $p<0.05$  (\*);  $p<0.01$  (\*\*);  $p<0.001$  (\*\*\*)).

### **Figure S6.**

(a-b) Heatmaps show expression fold-changes and methylation fold-changes in PSEN1/WT (a) and APOE4/WT (b). The methylation data are from GSE79144 (n=44). FC: fold-change.

# Supplementary Figure 1

**a**

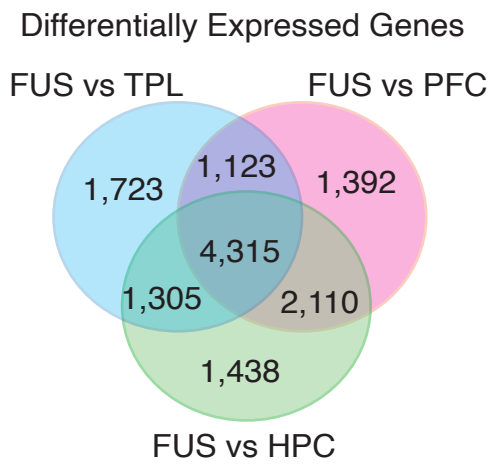

**b**

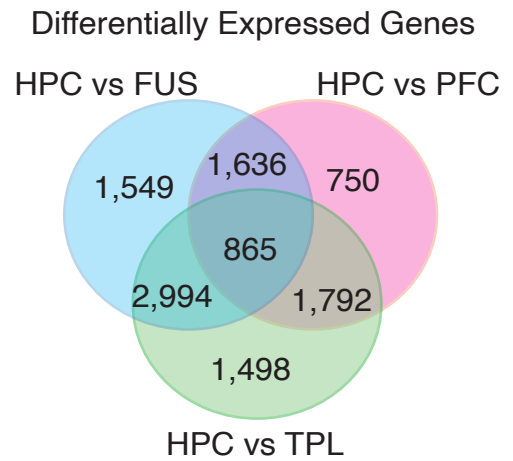

**c**

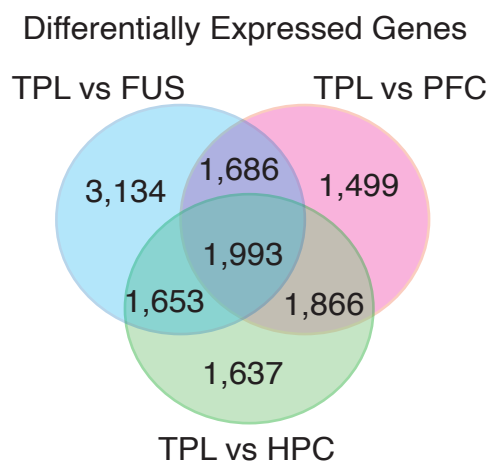

**d**

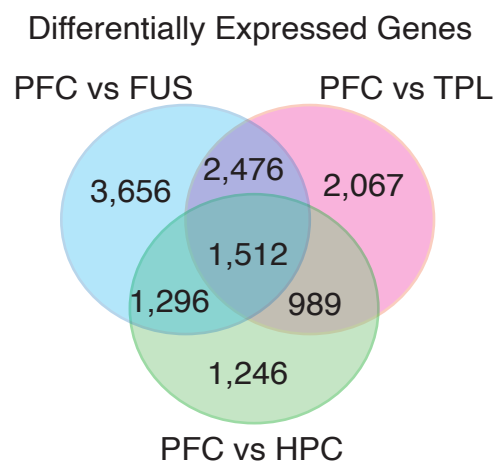



# Supplementary Figure 2

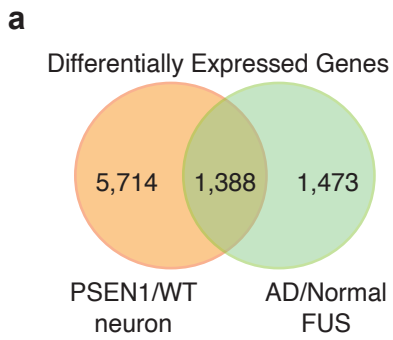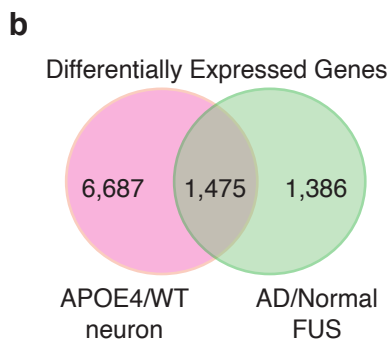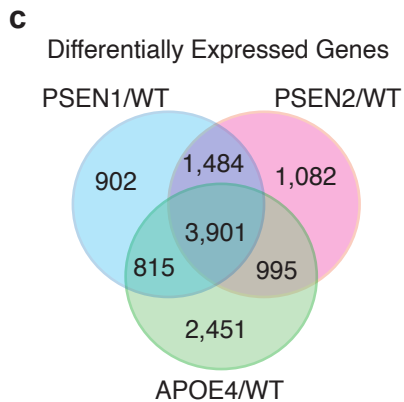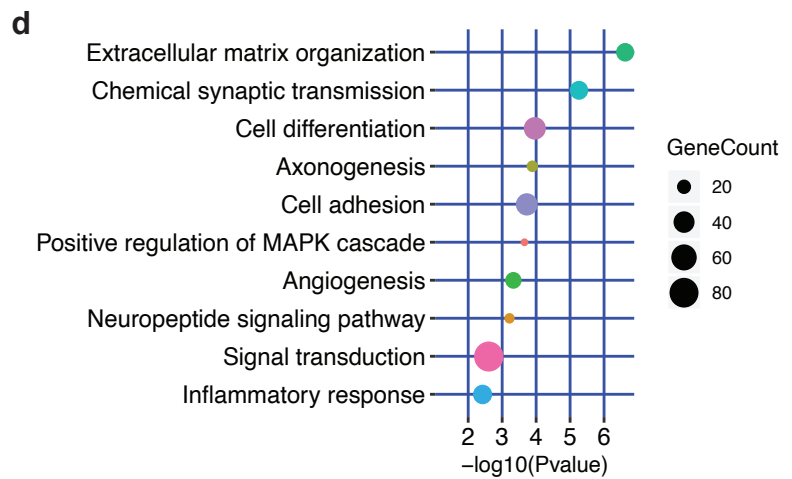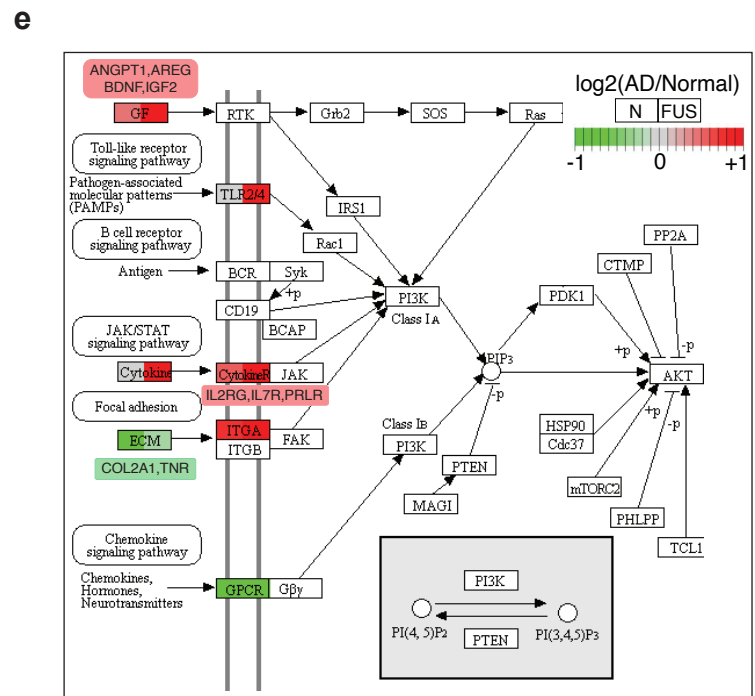

# Supplementary Figure 3

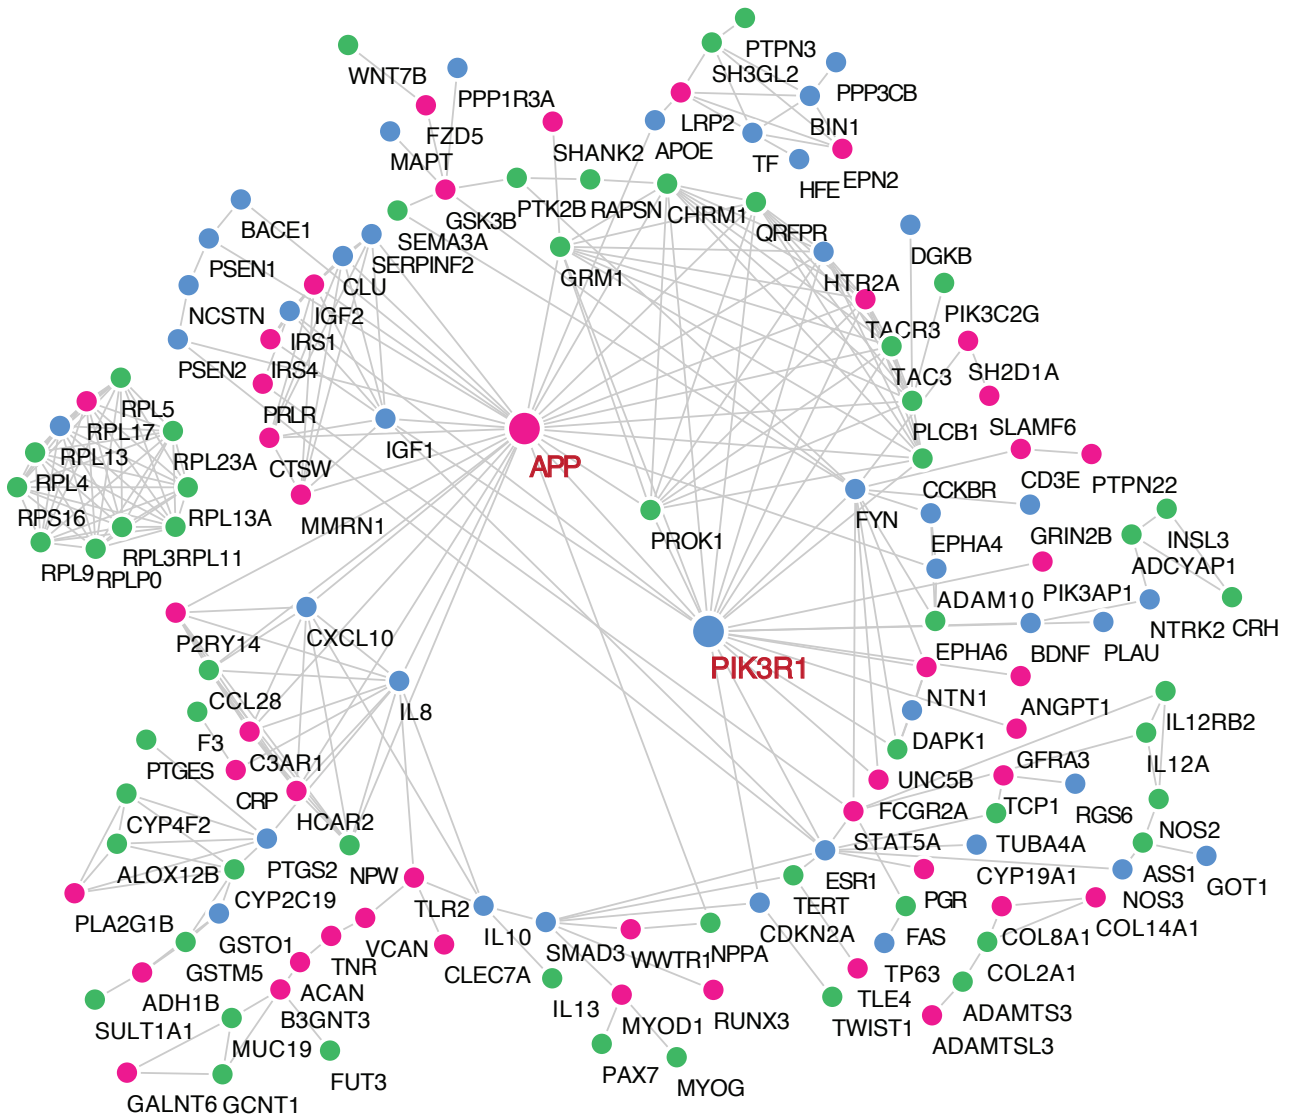

# Supplementary Figure 4

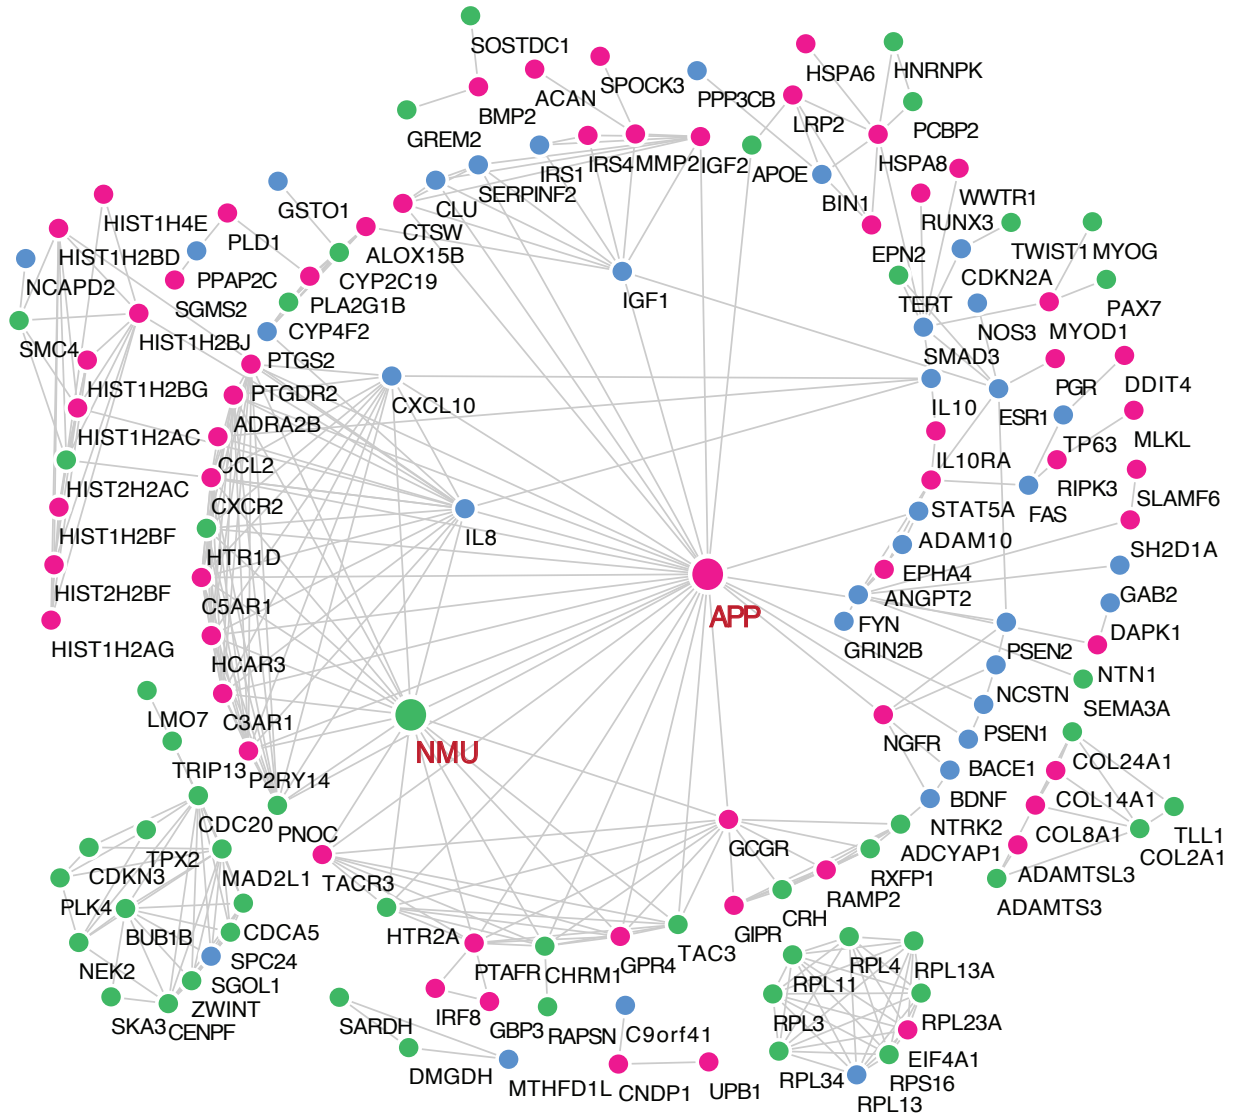



# Supplementary Figure 5

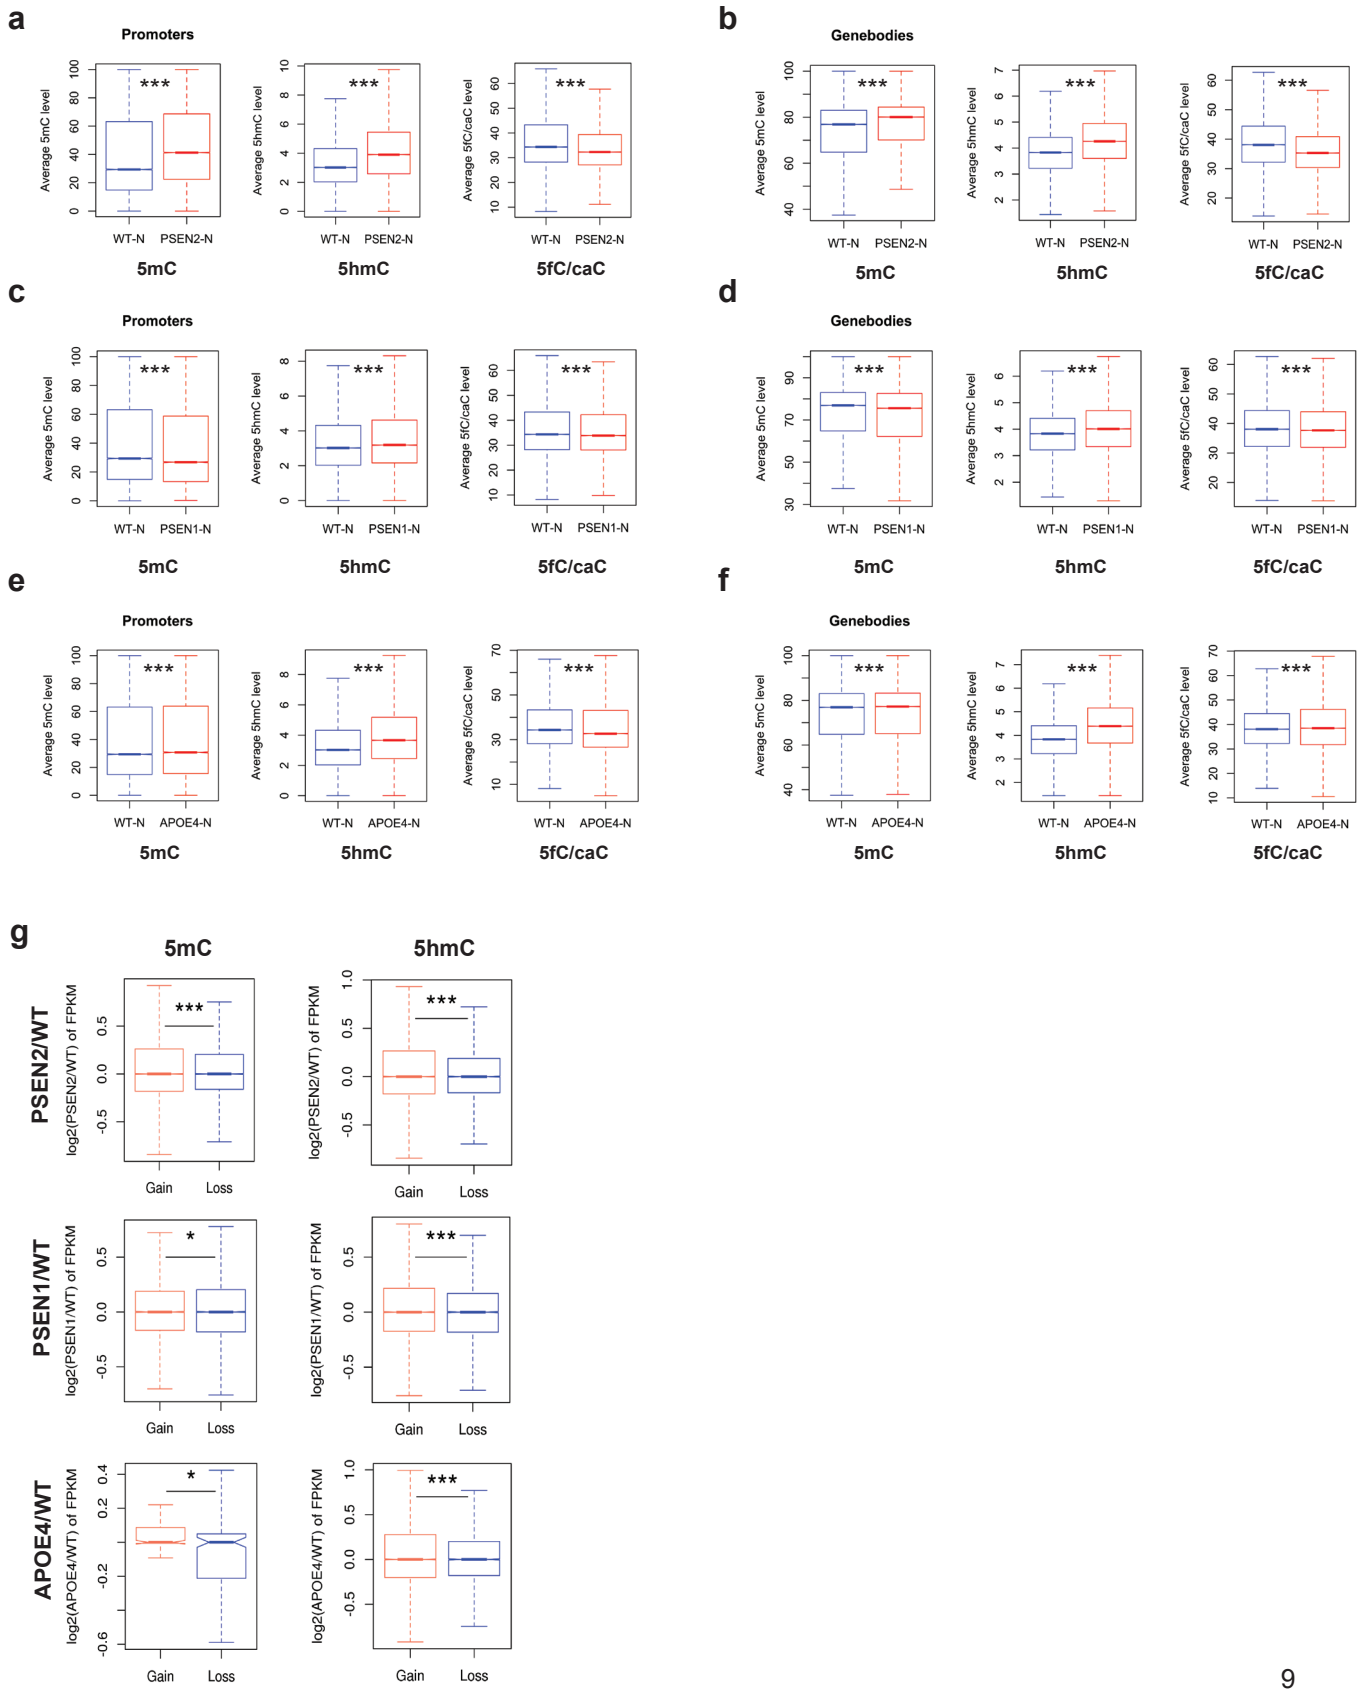

# Supplementary Figure 6

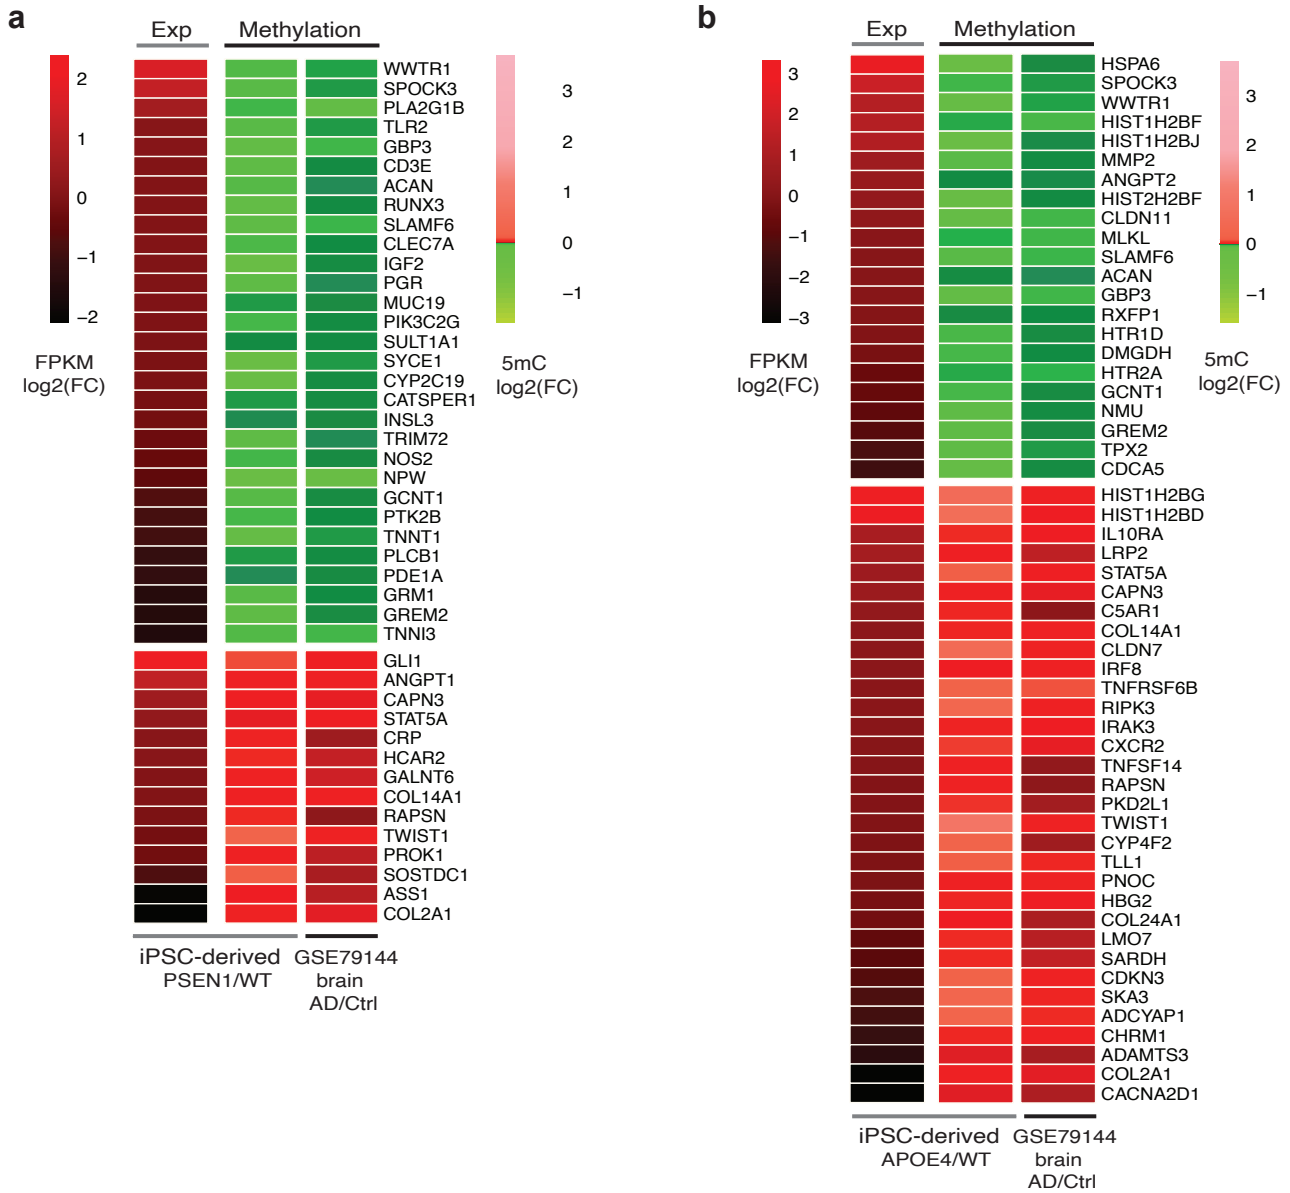

Supplement: 13148_2020_916_MOESM1_ESM.pdf [file 13148_2020_916_MOESM1_ESM.pdf]
